# Supplementary material for: Stabilization of Pickering Emulsions by Hairy Nanoparticles Bearing Polyanions
Source: PubMed Central journal article supplement (PMC6571738; doi:10.3390/polym11050816), 2019-05-07
Supplement: polymers-11-00816-s001.pdf [file polymers-11-00816-s001.pdf]

# **Stabilization of Pickering Emulsions by Hairy Nanoparticles Bearing Polyanions**

**Ying Zhang <sup>1</sup>, Kaimin Chen <sup>2,\*</sup>, Lan Cao <sup>1</sup>, Kai Li <sup>2</sup>, Qiaoling Wang <sup>2</sup>, Enyu Fu <sup>2</sup> and Xuhong Guo <sup>1,\*</sup>**

<sup>1</sup> State Key Laboratory of Chemical Engineering, School of Chemical Engineering, East China University of Science and Technology, Shanghai 200237, China; zy12fearless@163.com (Y.Z.); lancaoecust@outlook.com (L.C.)

<sup>2</sup> College of Chemistry and Chemical Engineering, Shanghai University of Engineering Science, Shanghai 201620, China; 18301939658@163.com (K.L.); woodsues@outlook.com (Q.W.); fuenyu1234@163.com (E.F.)

\* Correspondence: kmchen@sues.edu.cn (K.C.); guoxuhong@ecust.edu.cn (X.G.);  
Tel.: +86-137-0172-0354 (K.C.); +86-137-6436-8083 (X.G.)

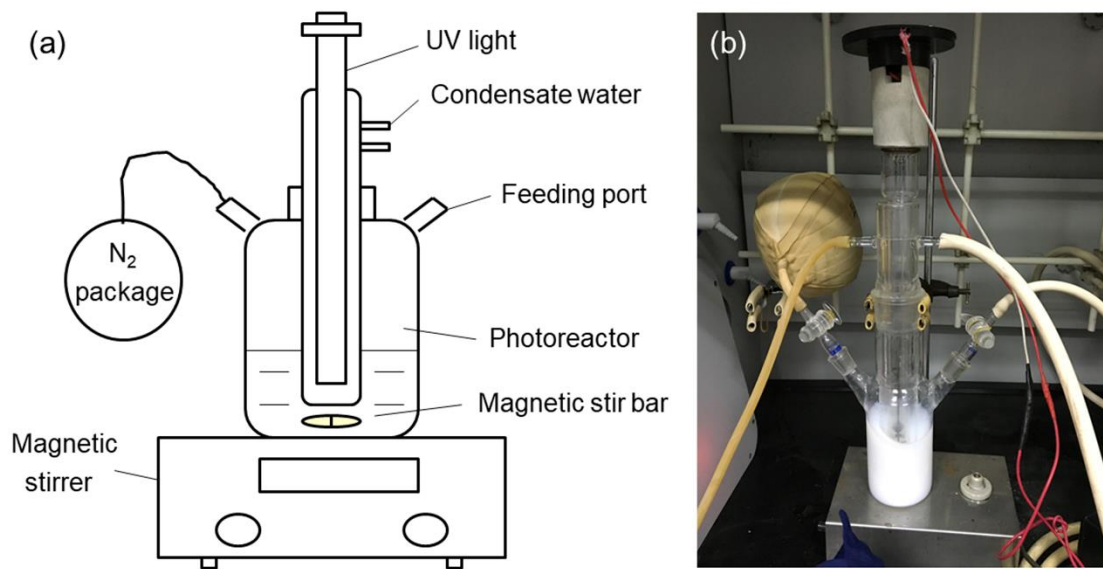

**Figure S1.** Schematic diagram (a) and photo (b) of the home-made photoreactor

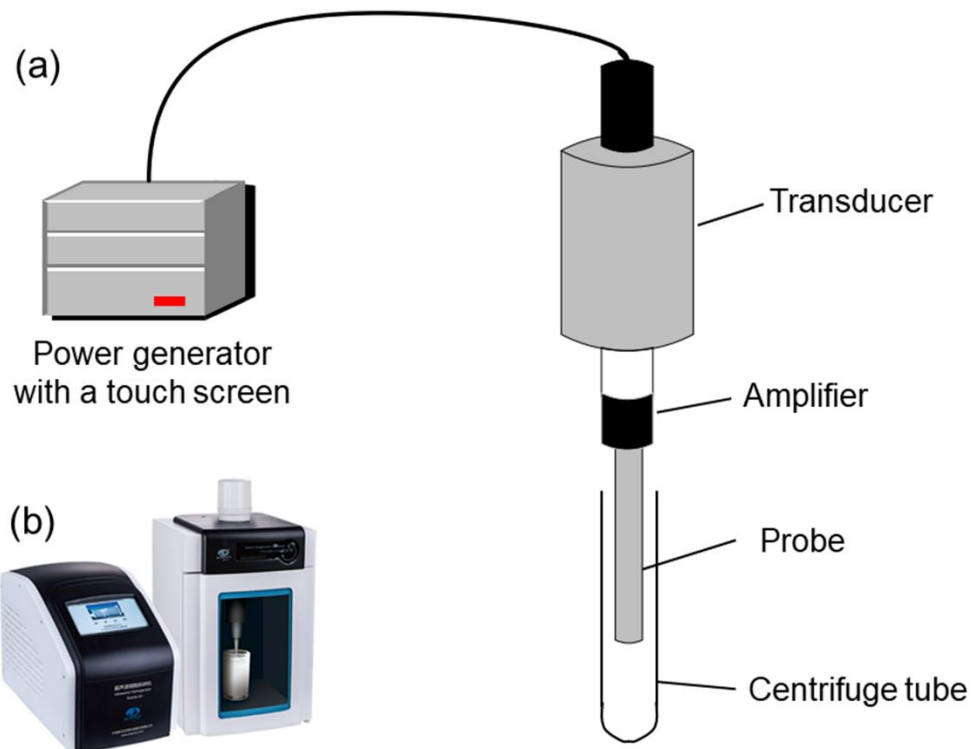

**Figure S2.** Schematic diagram (a) and photo (b) of ultrasonic homogenizer

**Table S1.** The effect of pH on PS@PSS size.

| pH | PS@PSS diameter (nm) | Thickness (nm) | PDI         |
|----|----------------------|----------------|-------------|
| 4  | 250.3±0.6            | 88.1±0.4       | 0.035±0.012 |
| 5  | 249.4±1.3            | 87.6±0.8       | 0.027±0.004 |
| 6  | 253.7±0.3            | 89.8±0.3       | 0.043±0.019 |
| 7  | 248.9±0.8            | 87.4±0.5       | 0.021±0.015 |
| 8  | 252.5±1.9            | 89.2±1.1       | 0.027±0.011 |
| 9  | 252.9±0.8            | 89.4±0.5       | 0.016±0.007 |
| 10 | 250.3±0.5            | 88.1±0.4       | 0.024±0.014 |
| 11 | 249.1±1.7            | 87.5±1.0       | 0.044±0.023 |

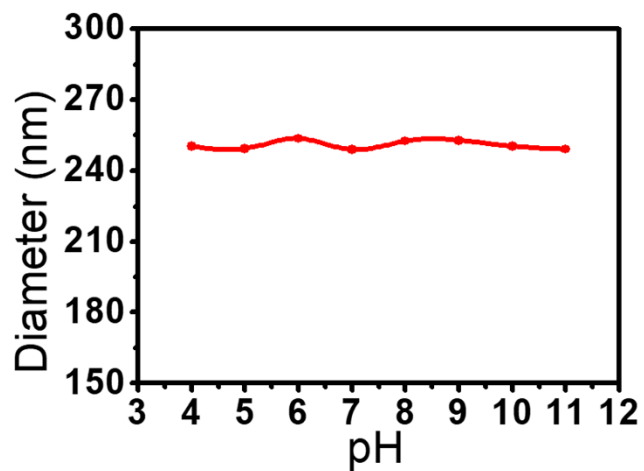

**Figure S3.** The effect of pH on PS@PSS size.

No changes of PS@PSS diameter with pH was observed. So PS@PSS nanoparticles are not responsive to pH.
